# Supplementary material for: A new high capacity cathode material for Li/Na-ion batteries: dihafnium sulfide (Hf2S)
Source: Royal Society of Chemistry journal article supplement (doi:10.1039/d2cp05041b), 2022-11-22
Supplement: d2cp05041b7.pdf [file d2cp05041b7.pdf]

Cite this: DOI: 00.0000/xxxxxxxxxx

## Supplementary - A new extraordinary high capacity cathode material for Li/Na-ion batteries: Dihafnium sulfide ( $\text{Hf}_2\text{S}$ )<sup>†</sup>

Yelda Kadioglu

Received Date

Accepted Date

DOI: 00.0000/xxxxxxxxxx

**Table 1** Magnetic moments on each atom of  $\text{Hf}_2\text{S}$  monolayer under the different values of strain

| Strain ratio | Hf1 ( $\mu_B$ ) | Hf2 ( $\mu_B$ ) | S ( $\mu_B$ ) | Total ( $\mu_B$ ) |
|--------------|-----------------|-----------------|---------------|-------------------|
| -18          | 0.357           | 0.357           | 0.078         | 0.792             |
| -16          | 0.239           | 0.239           | 0.022         | 0.5               |
| -14          | 0.445           | 0.455           | 0.029         | 0.93              |
| -12          | 0.31            | 0.309           | 0.013         | 0.632             |
| -10          | 0.423           | 0.41            | 0.007         | 0.839             |
| -8           | 0.31            | 0.311           | 0.004         | 0.625             |
| -6           | 0.271           | 0.271           | -0.002        | 0.54              |
| -4           | 0.313           | 0.315           | -0.004        | 0.624             |
| -2           | 0.348           | 0.35            | -0.005        | 0.693             |
| 0            | 0.415           | 0.415           | -0.009        | 0.822             |
| 2            | 0.285           | 0.287           | -0.009        | 0.563             |
| 4            | 0.274           | 0.273           | -0.008        | 0.539             |
| 6            | 0.115           | 0.114           | -0.003        | 0.226             |
| 8            | 0               | 0               | 0             | 0                 |
| 10           | 0.179           | -0.179          | 0             | 0                 |
| 12           | -0.001          | 0.002           | 0             | 0                 |
| 14           | 0.373           | 0.341           | 0.014         | 0.728             |
| 16           | 0.027           | 0.026           | 0.002         | 0.055             |
| 18           | 0.028           | 0.03            | 0.002         | 0.06              |

Electronic band structure of  $\text{Hf}_2\text{S}$  monolayer included spin-orbit interaction was presented in FigS1. It can be seen that spin-orbit calculation has no significant effect on the band structure when compared with the PBE band structure as shown in the main text.

Because F-termination changed the band structure of  $\text{Hf}_2\text{S}$  monolayer, spin-orbit calculation (SOC) was performed in elec-

tronic structure of F-terminated system. While PBE band structure has metallic effect, the band gap of 0.18 eV was opened when spin-orbit interaction was included as shown in FigS2.

The band structures of one Li or Na atom adsorbed to  $4 \times 4$  supercell  $\text{Hf}_2\text{S}$  monolayer was presented in FigS3. It is seen that the system maintains its metallic property after Li/Na adsorption.

Li atoms were increased one by one on  $4 \times 4$  supercell  $\text{Hf}_2\text{S}$  monolayer up to eight atom and preferable sites of each Li atom were shown in FigS4. The atoms that choose a site other than the hollow according to the increase of the atoms, when they reach the number of eight atoms, are perfectly arranged in the hollow site.

The adsorption energy ( $E_{ads}$ ) of the Li atoms increased one by one on  $\text{Hf}_2\text{S}$  monolayer was shown in FigS5. This  $E_{ads}$  was calculated as below:

$$E_{ads} = E_{\text{Hf}_2\text{S}} + n \times E_{\text{Li}_{bulk}} - E_{\text{Total}} \quad (1)$$

Here  $E_{\text{Hf}_2\text{S}}$  is the energy of bare  $\text{Hf}_2\text{S}$  monolayer,  $E_{\text{Li}_{bulk}}$  is the energy per atom in bulk Li form, and  $E_{\text{total}}$  is the energy of total system of Li adsorbed to  $\text{Hf}_2\text{S}$  monolayer.

Linear increase of  $E_{ads}$  was remarkable.

Physics Department, Adnan Menderes University, Aydın 09100 TR; E-mail: yeldaakadioglu@gmail.com

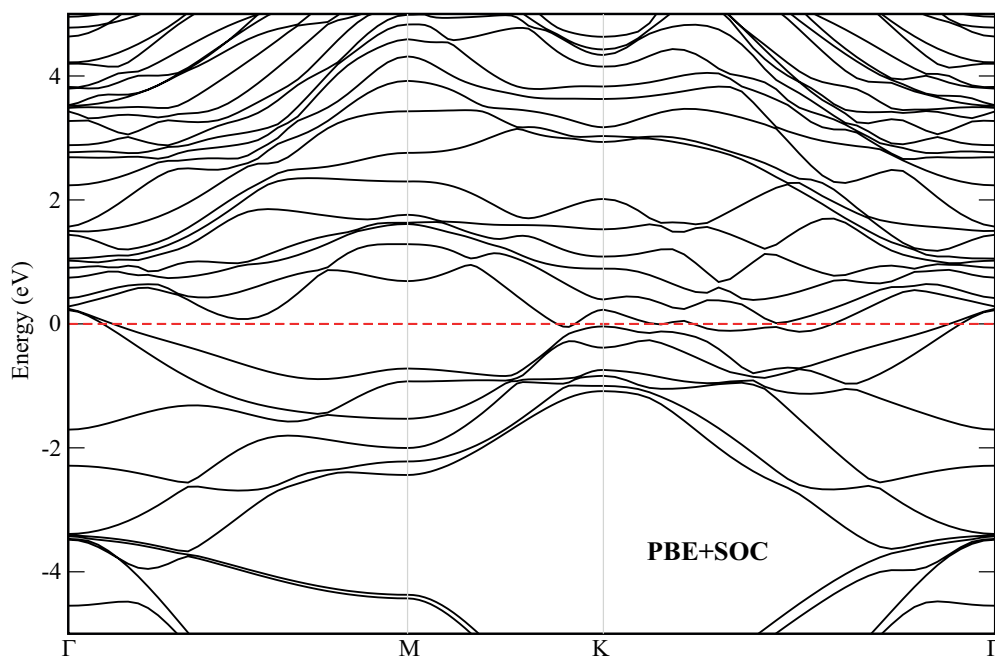

**Fig. S1** Electronic band structure of bare Hf<sub>2</sub>S monolayer with spin-orbit interaction. Fermi level was shifted to zero and shown by dashed line.

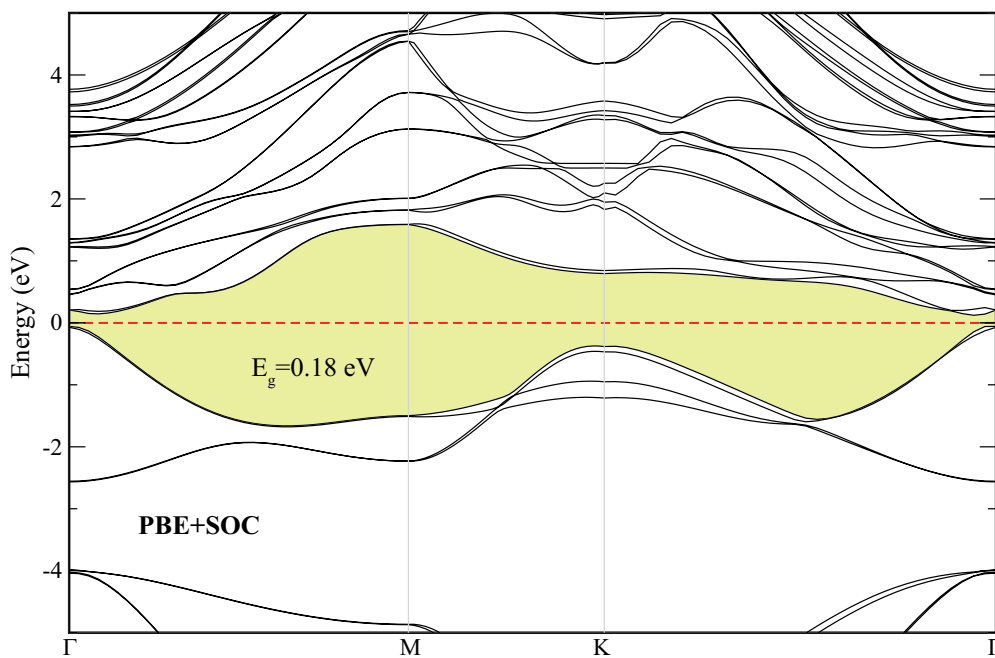

**Fig. S2** Electronic band structure of F-terminated Hf<sub>2</sub>S monolayer with spin-orbit interaction. Fermi level was shifted to zero and shown by dashed line.

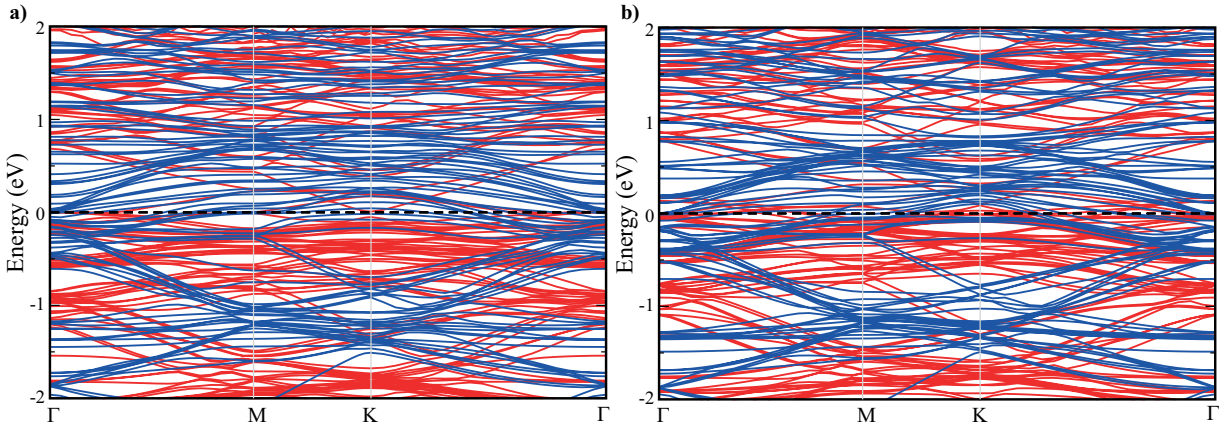

**Fig. S3** Electronic band structure of a) one Li and b) one Na atom adsorbed to Hf<sub>2</sub>S monolayer with spin-orbit interaction. The red and blue lines indicate spin up and spin down states.

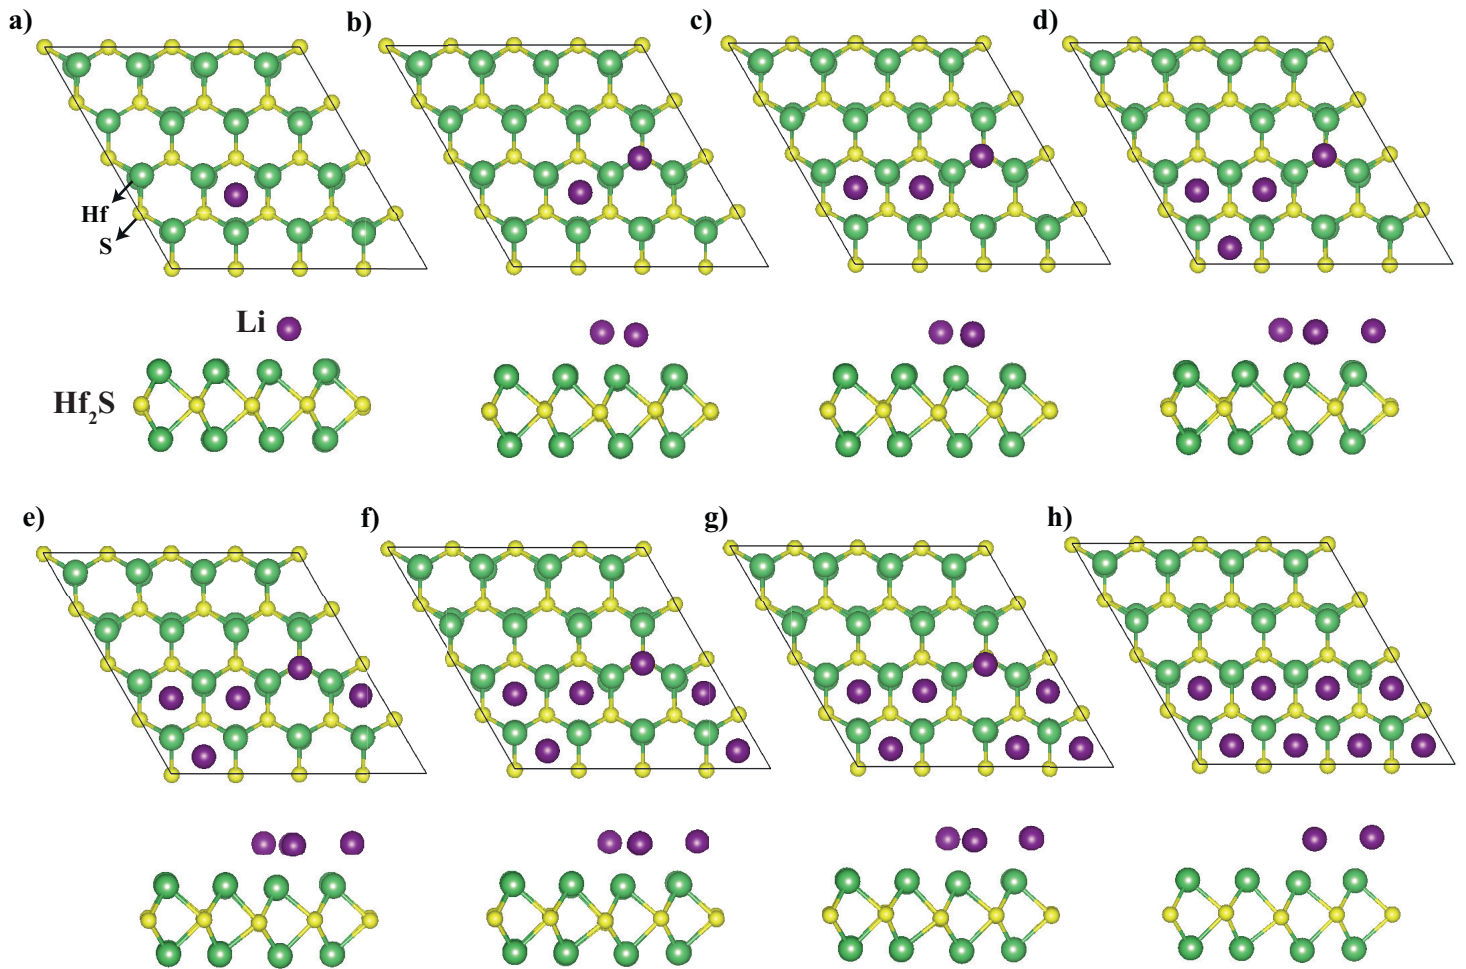

**Fig. S4** a-h) Top and view sides of the structures obtained by increasing Li atoms one by one on the Hf<sub>2</sub>S monolayer.

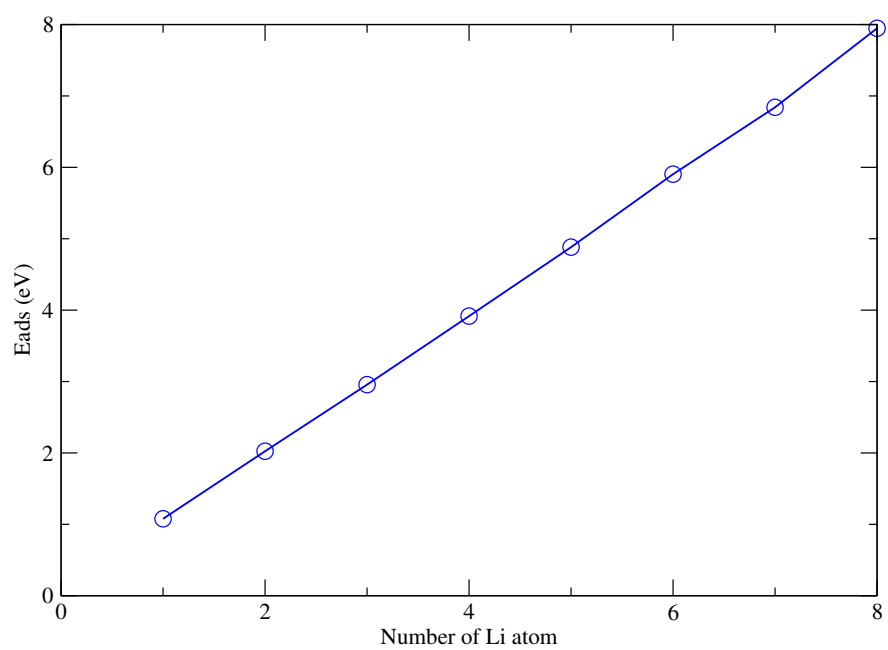

**Fig. S5** The adsorption energy of the Li atoms increased one by one on Hf<sub>2</sub>S monolayer.
